# Supplementary material
Source: publisher figshare collection journal article supplement (https://acs.figshare.com/ndownloader/files/4661164)
Supplement: Supplementary file 1 [file 4661164]

Supplementary Information for  
**Coordination Chemistry of a Model for the GP Cofactor in the Hmd Hydrogenase:  
Hydrogen-Bonding and Catalysis**

by

Aaron M. Royer, Thomas B. Rauchfuss\*, Scott R. Wilson\*

**General considerations.** Unless otherwise indicated, reactions were conducted using standard Schlenk techniques ( $N_2$ ) at room temperature with stirring. cmhpH<sub>2</sub> was synthesized according to a modification of the literature preparation (given below).<sup>1</sup> The proposed structure was confirmed by <sup>1</sup>H NMR. Attempts to prepare cmhpH<sub>2</sub> by the method of Shaw *et al.* were unsuccessful.<sup>2</sup> 2-hydroxypyridine, pyrazole, Et<sub>3</sub>N, picolinic acid, 2-pyridylacetic acid hydrochloride, and AgPF<sub>6</sub> were purchased from Aldrich. DL-1-phenylethanol was obtained from Alfa-Aesar. Electrospray ionization-mass spectra (ESI-MS) were acquired using a Micromass Quattro QHQ quadrupole-hexapole-quadrupole instrument. <sup>1</sup>H NMR was acquired on Varian UNITY INOVATM 500NB and UNITY 500 NB instruments. Elemental analyses were performed by the School of Chemical Sciences Microanalysis Laboratory utilizing a Model CE 440 CHN Analyzer.

**cmhpH<sub>2</sub>.** A solution of 10 mL (79 mmol) ethyl 3-aminocrotonate in 20 mL Et<sub>2</sub>O was purged with HCl at 0 °C. Upon formation of an off-white precipitate, the addition of HCl was stopped. A second 10-mL portion (79 mmol) of ethyl 3-aminocrotonate in 20 mL Et<sub>2</sub>O was added, and the combined slurry was thoroughly stirred for 5 min. Ether was removed by vacuum to give a cloudy yellow oil, which was heated at 120 °C. Crystals formed (presumably NH<sub>4</sub>Cl) and the oil thickened. The residue was washed with 40 mL water and 40 mL Et<sub>2</sub>O, leaving ~7.6 g of an off-white solid. This solid residue was extracted into a solution of 1.65 g (41 mmol) NaOH in 50 mL of H<sub>2</sub>O. The solution was neutralized to pH7 by the addition of HCl, whereupon a colorless precipitate formed. The precipitate was collected by filtration and washed with 30 mL EtOH, leaving white crystals. Yield: 3.52 g (21 mmol) (26%). <sup>1</sup>H NMR (500 MHz, DMSO): 2.04 (s, 3H, 4-CH<sub>3</sub>), 3.14 (s, 2H, CO<sub>2</sub>CH<sub>2</sub>), 5.73 (s, 1H, aryl-CH), 5.86 (s, 1H, aryl-CH), 12.18 (s, 1H, OH) exchanged in D<sub>2</sub>O.

**Cp\*IrCl(cmhpH) (1).** A colorless solution of 0.1091 g (0.65 mmol) of cmhpH<sub>2</sub> and 91 μL (0.65 mmol) of Et<sub>3</sub>N in 3 mL of MeCN was transferred to an orange solution of 0.260 g (0.32 mmol) of (Cp\*IrCl<sub>2</sub>)<sub>2</sub> in 2 mL of MeCN. The reaction solution became yellow and a yellow precipitate appeared upon stirring 1 h. The bright yellow powder was collected by filtration and washed with 5 mL cold MeCN and 5 mL Et<sub>2</sub>O. Yield: 300 mg (0.57 mmol) (87 %). <sup>1</sup>H NMR (500 MHz, CD<sub>2</sub>Cl<sub>2</sub>): δ1.58 (s, 15 H, Cp\*), 2.39 (s, 3H, 4-CH<sub>3</sub>), 3.64 (q, 2H, CO<sub>2</sub>CH<sub>2</sub>), 6.71 (s, 1H, aryl-CH), 6.79 (s, 1H, aryl-CH), 9.46 (s, 1H, OH) exchanged in D<sub>2</sub>O. Anal. Calcd for C<sub>18</sub>H<sub>23</sub>ClIrNO<sub>3</sub> (found): C, 40.86 (40.64); H, 4.38 (4.27); N, 2.65 (2.80).

**Cp\*RhCl(cmhpH) (2).** This compound was prepared similarly to **1**. Orange powder. Yield: 80%. <sup>1</sup>H NMR (500 MHz, CD<sub>2</sub>Cl<sub>2</sub>): δ1.60 (s, 15 H, Cp\*), 2.39 (s, 3H, 4-CH<sub>3</sub>), 3.67 (q, 2H, CO<sub>2</sub>CH<sub>2</sub>), 6.68 (s, 1H, aryl-CH), 6.78 (s, 1H, aryl-CH), 9.83 (s, 1H, OH) exchanged in D<sub>2</sub>O. Anal. Calcd for C<sub>18</sub>H<sub>23</sub>ClNO<sub>3</sub>Rh (found): C, 49.16 (48.96); H, 5.27

(5.27); N, 3.19 (3.37). Single crystals of **2** suitable for X-ray diffraction were obtained by diffusion of Et<sub>2</sub>O into a concentrated solution of **2** in MeOH.

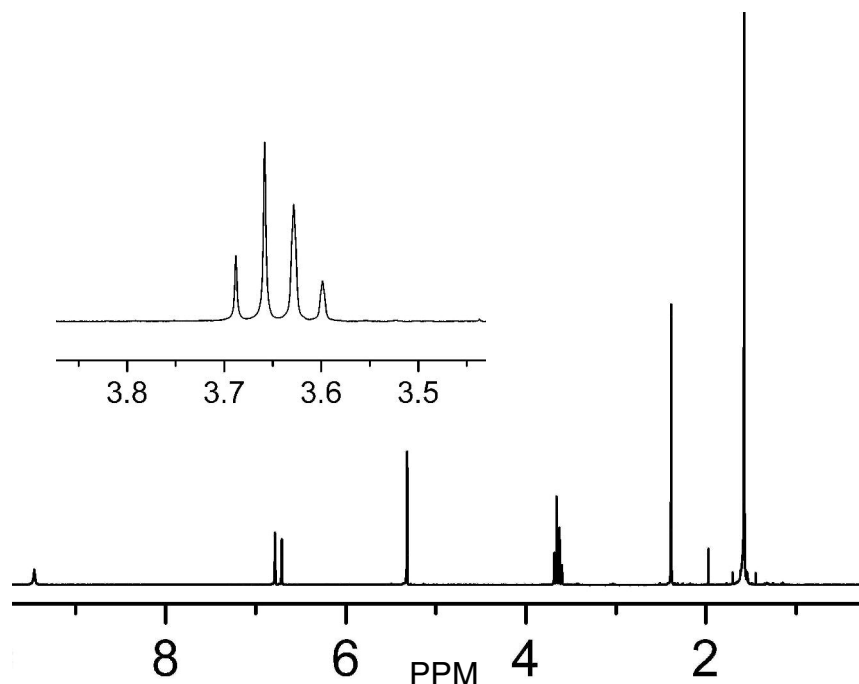

**Figure 1.** <sup>1</sup>H NMR spectrum of Cp\*IrCl(cmhpH) in CD<sub>2</sub>Cl<sub>2</sub> solution (inset: Methylene signals showing bound chelate ring).

**Cp\*IrCl(paa), (3) paaH = 2-pyridylacetic acid.** A mixture of 199 mg (0.25 mmol) of (Cp\*IrCl<sub>2</sub>)<sub>2</sub>, 86.8 mg (0.50 mmol) of paaH·HCl, and 69.1 mg (0.50 mmol) K<sub>2</sub>CO<sub>3</sub> was stirred in 10 mL of 1:1 MeOH:H<sub>2</sub>O for 45 min. by which time the orange color disappeared. Upon concentrating the solution to 2 mL, a yellow precipitate appeared. The solid was collected by filtration and washed with 5 mL Et<sub>2</sub>O. Yield: 191 mg (0.383 mmol, 77 %). <sup>1</sup>H NMR (500 MHz, CD<sub>2</sub>Cl<sub>2</sub>): δ 1.58 (s, 15 H, Cp\*), 3.61 (d, 1H, 14.7 Hz, CO<sub>2</sub>CHH), 3.77 (d, 1H, 14.7 Hz, CO<sub>2</sub>CHH), 7.31 (d of t, 1H, 0.8 Hz, 6 Hz, NCHCH), 7.35 (d, 1H, 8 Hz, NCCCH), 7.76 (d of t, 1H, 2 Hz, 8 Hz, NCCCH), 8.69 (d of d, 1H, 1 Hz, 6 Hz, NCH). Anal. Calcd for C<sub>17</sub>H<sub>21</sub>ClIrNO<sub>2</sub> (found): C, 40.92 (40.78); H, 4.24 (3.92); N, 2.81 (2.79).

**Cp\*IrCl(pa), (4) (paH = picolinic acid).** A mixture of 79.7 mg (0.10 mmol) of (Cp\*IrCl<sub>2</sub>)<sub>2</sub>, 24.6 mg (0.10 mmol) of paH, and 27.6 mg (0.10 mmol) K<sub>2</sub>CO<sub>3</sub> was stirred in 8 mL of 1:1 MeOH:H<sub>2</sub>O for 45 min. (until orange color disappeared). The solution was concentrated to 2 mL under vacuum with formation of a yellow precipitate. The solid was collected by filtration and washed with 5 mL Et<sub>2</sub>O. Yield: 74 mg (0.153 mmol, 76 % yield). <sup>1</sup>H NMR (500 MHz, CDCl<sub>3</sub>): δ 1.70 (s, 15 H, Cp\*), 7.55 (d of t, 1H, 1.5 Hz, 5.5 Hz, NCHCH), 7.94 (d of t, 1H, 1.4 Hz, 8 Hz, NCCCH), 8.13 (d of d, 1H, 0.7 Hz, 8 Hz, NCCCH), 8.69 (d of d, 1H, 0.6 Hz, 5 Hz, NCH). Anal. Calcd for C<sub>16</sub>H<sub>19</sub>ClIrNO<sub>2</sub> (found): C, 39.62 (39.40); H, 3.95 (3.81); N, 2.89 (2.84).

**General Procedure for Treatment of Cp\*RhCl(cmhpH), Cp\*IrCl(cmhpH), Cp\*IrCl(paa), and Cp\*IrCl(pa) with AgPF<sub>6</sub> in D<sub>2</sub>O.** 10 mg (0.023 mmol) Cp\*RhCl(cmhpH) was dissolved 0.7 mL D<sub>2</sub>O in an NMR tube. <sup>1</sup>H NMR was obtained. 6.3 mg (0.025 mmol) AgPF<sub>6</sub> was added and a white precipitate formed immediately. <sup>1</sup>H NMR was obtained.

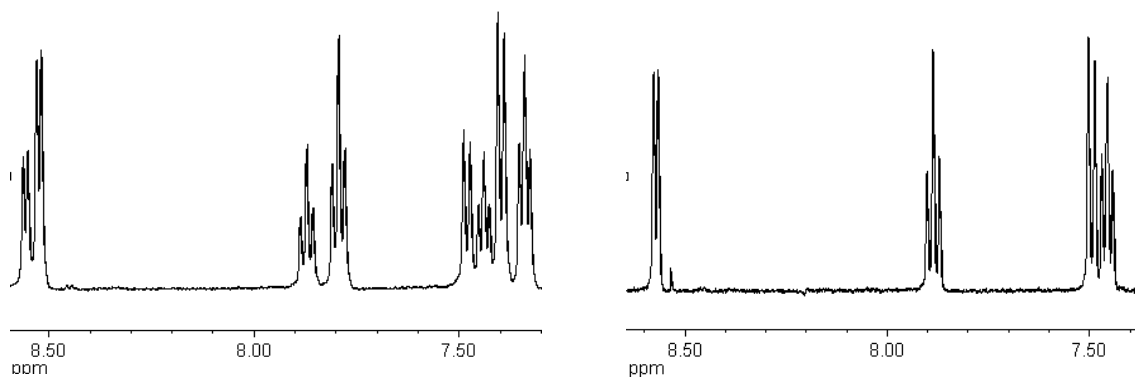

**Figure 2.** (left) <sup>1</sup>H NMR spectrum of Cp\*IrCl(paa) in D<sub>2</sub>O solution before (right) and after (left) addition of AgPF<sub>6</sub>.

**[Cp\*Rh(MeCN)(cmhpH)][PF<sub>6</sub>].** A solution of 114 mg (0.45 mmol) of AgPF<sub>6</sub> in 8 mL MeCN was added to a mixture of 200 mg (0.45 mmol) **2** in 3 mL MeCN. A white precipitate formed immediately. The orange solution was filtered and solvent removed by vacuum. Orange microcrystals were obtained by recrystallization from 2 mL MeCN and 10 mL of a 1:1 Et<sub>2</sub>O: hexanes mixture. Solid was dried by vacuum. Yield: 222 mg (0.38 mmol) (85%). <sup>1</sup>H NMR (500 MHz, CD<sub>3</sub>CN): δ 1.625 (s, 15 H, Cp\*), 1.737 (s, 3H, CH<sub>3</sub>CN) exchanged with CD<sub>3</sub>CN, 2.324 (s, 3H, 4-CH<sub>3</sub>), 3.53 (d, broad, 2H, CO<sub>2</sub>CH<sub>2</sub>), 6.737 (s, 1H, aryl-CH), 6.797 (s, 1H, aryl-CH). ESI-MS: m/z = 445.3 ([Cp\*Rh(MeCN)(cmhpH)]<sup>+</sup>), 404.3([Cp\*Rh(cmhpH)]<sup>+</sup>), 401.3([Cp\*Rh(MeCN)(cmhpH-CO<sub>2</sub>)]<sup>+</sup>), 360.3([Cp\*Rh(cmhpH-CO<sub>2</sub>)]<sup>+</sup>).

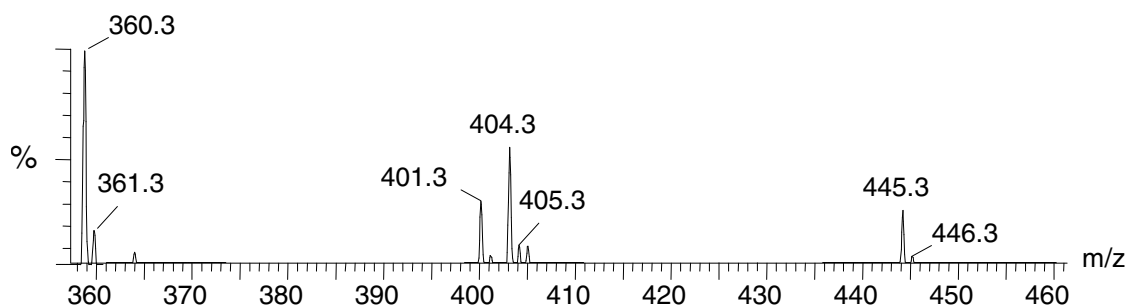

**Figure 3.** ESI-MS of Cp\* Rh(MeCN)(cmhpH) in MeCN solution showing signals due to fragmentation by loss of CO<sub>2</sub> and MeCN.

**Cp\*Rh(hp)(cmhpH)·1.5 MeCN (**5**).** A solution of 19.3 mg (0.20 mmol) of 2-hydroxypyridine and 28 μL (0.20 mmol) of Et<sub>3</sub>N in 5 mL of CH<sub>2</sub>Cl<sub>2</sub> was transferred to an orange solution of 90 mg (0.20 mmol) of **2** in 3 mL CH<sub>2</sub>Cl<sub>2</sub>. The solution darkened and was stirred 10 min. Et<sub>3</sub>NHCl was removed by extraction with water 3 x 3 mL (under

vigorous mixing all products dissolve in water layer). The organic phase was evaporated, and the product was extracted into 1 mL MeCN, and this extract was diluted with 10 mL of a 1:1 Et<sub>2</sub>O/hexanes and stored at -20 °C for 24 h. Solvent was decanted from the red crystals (some of which were suited for X-ray diffraction). Yield: 50.3 mg (0.20 mmol, 50 %). <sup>1</sup>H NMR (500 MHz, CD<sub>2</sub>Cl<sub>2</sub>): δ 1.46 (s, 15 H, Cp\*), 2.16 (s, 3H, 4-CH<sub>3</sub>), 3.50 (d, 1H, 15 Hz, CO<sub>2</sub>CHH), 3.55 (d, 1H, 15 Hz, CO<sub>2</sub>CHH), 6.30 (s, 1H, cmhpH-aryl-CH), 6.34 (s, 1H, cmhpH-aryl-CH), 6.61 (d of t, 1H, 6 Hz, 1 Hz, hp-NCCCH), 6.68 (d, 1H, 8 Hz, hp-NCOCH), 7.461 (d of t, 1H, 7 Hz, 2 Hz, hp-NCOCCCH), 8.32 (d, 1H, 5 Hz, hp-NCH) 17.1 (s, 1H, OH···O; this signal disappeared upon addition of D<sub>2</sub>O).

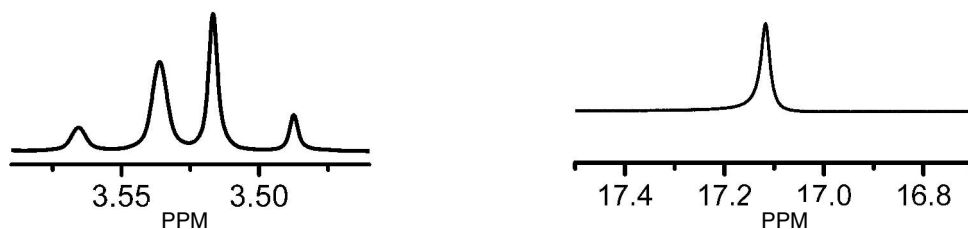

**Figure 4.** From the <sup>1</sup>H NMR spectrum of Cp\*Rh(hp)(cmhpH) in CD<sub>2</sub>Cl<sub>2</sub> solution: methylene signals (left) and shared proton between 2-hp and cmhpH (right).

**Cp\*Rh(C<sub>3</sub>H<sub>3</sub>N<sub>2</sub>)(cmhpH) (6).** A solution of 8.5 mg (0.128 mmol) of pyrazole and 18 μL (0.128 mmol) of Et<sub>3</sub>N in 5 mL of CH<sub>2</sub>Cl<sub>2</sub> was transferred to an orange solution of 56.4 mg (0.128 mmol) of **2** in 5 mL CH<sub>2</sub>Cl<sub>2</sub>. After stirring for 30 min. the solution was extracted three times with 5 mL water. Solvent was removed by vacuum, and the product was extracted into ~1mL CH<sub>2</sub>Cl<sub>2</sub>. The product precipitated from solution upon addition of 10 mL 1:1 Et<sub>2</sub>O/hexanes. Yield: 28 mg (0.059 mmol, 46 %). <sup>1</sup>H NMR (500 MHz, CD<sub>2</sub>Cl<sub>2</sub>): δ 1.52 (s, 15 H, Cp\*), 2.12 (s, 3H, 4-CH<sub>3</sub>), 3.32 (d, 1H, 14 Hz, CO<sub>2</sub>CHH), 3.55 (d, 1H, 14 Hz, CO<sub>2</sub>CHH), 6.07 (s, 1H, cmhpH-aryl-CH), 6.15 (d, 1H, 1 Hz, cmhpH-aryl-CH), 6.39 (q, 1H, 2Hz, pyrazolate-CCHC), 7.61 (d, 1H, 1 Hz, pyrazolate-NCH), 7.67 (s, 1H, pyrazolate-NCH), 16.3 (s, 1H, OH···O; this signal disappeared upon addition of D<sub>2</sub>O).

**Dehydrogenation of 1-Phenylethanol.** In a typical procedure, a mixture of 3.4 mg (0.0060 mmol) of Cp\*IrCl(cmhpH) in 725 μL (6.00 mmol) DL-1-phenylethanol was heated by oil bath at 130 °C. After 2 h, 50 μL of reaction mixture was removed, diluted with CDCl<sub>3</sub> and the ratio of PhCOMe/PhCHOHMe was analyzed by <sup>1</sup>H NMR spectroscopy.

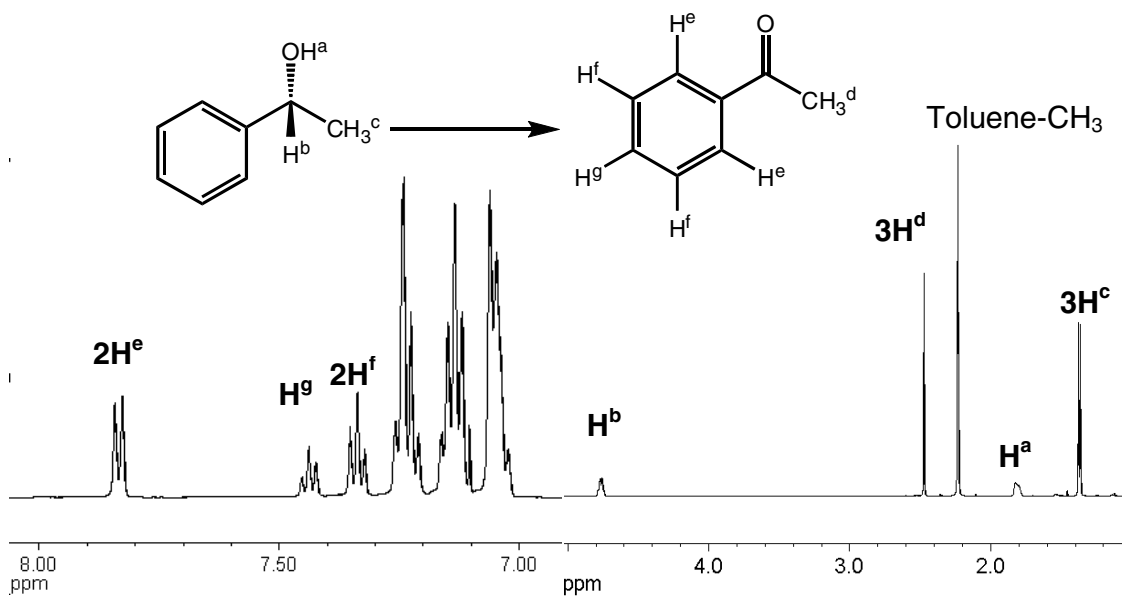

**Figure 5.** Illustrative  $^1\text{H}$  NMR spectrum of products from dehydrogenation of 1-phenylethanol (CDCl<sub>3</sub> solution).

1. Collie, J. N. *J. Chem. Soc.* **1897**, 71, 299-311
2. Ahmed, S.; Lofthouse, R.; Shaw, G. *J. Chem. Soc.* **1976**, 71, 1969-1975
